# Supplementary material
Source: HighWire-hosted journal article supplement (https://hw-f5-jim.highwire.org/content/65/5/899)

## Supplementary Figures

**Figure S1.** Sensitivity analyses of (A) all-cause hospital admission, (B) all-cause length of hospital stay, (C) all-cause mortality, (D) heart failure-related admission, (E) heart failure-related length of hospital stay, and (F) heart failure-related mortality.

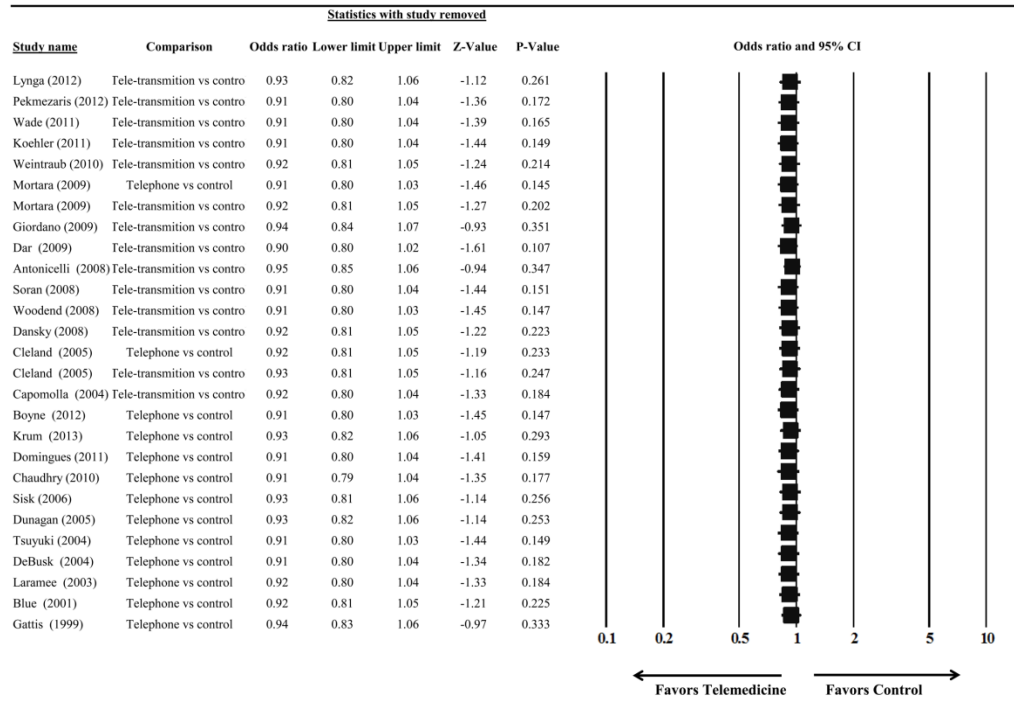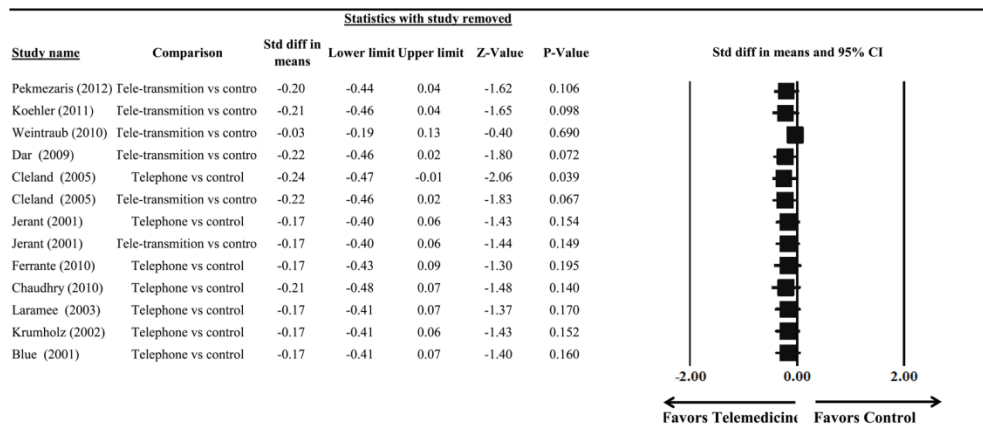

Statistics with study removed

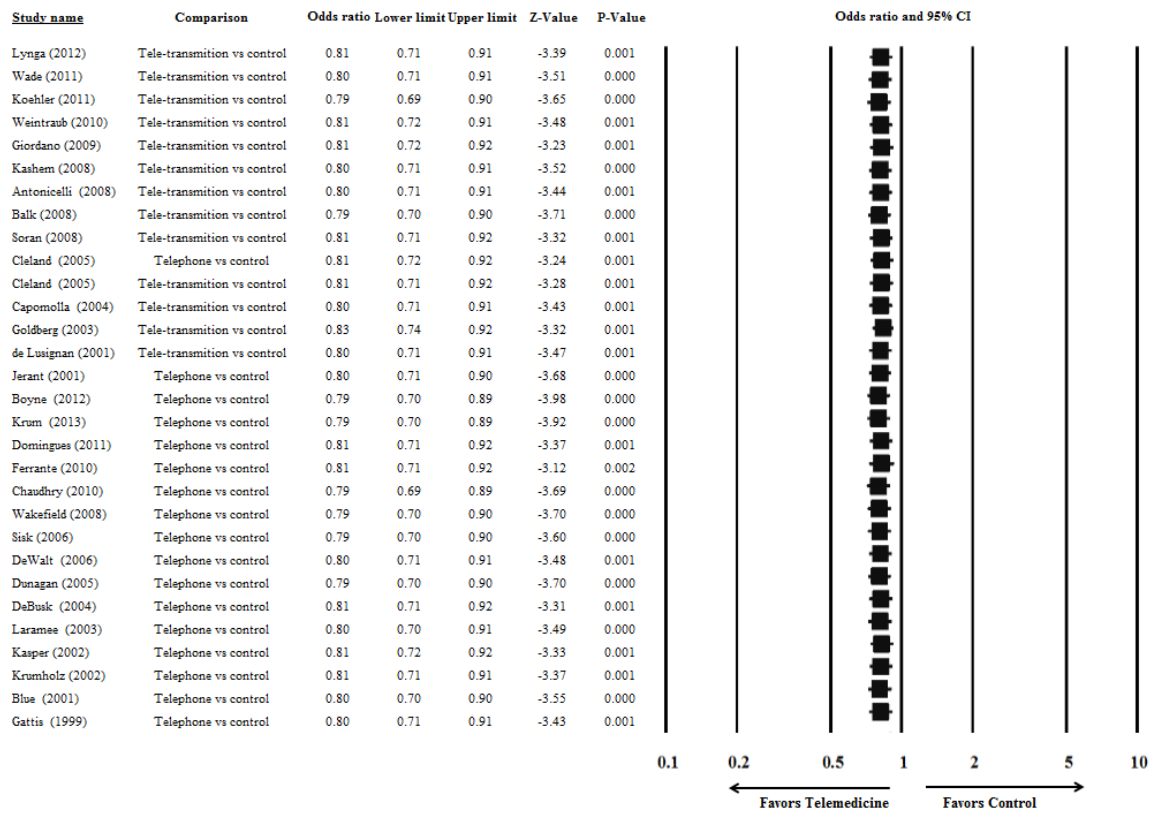

Statistics with study removed

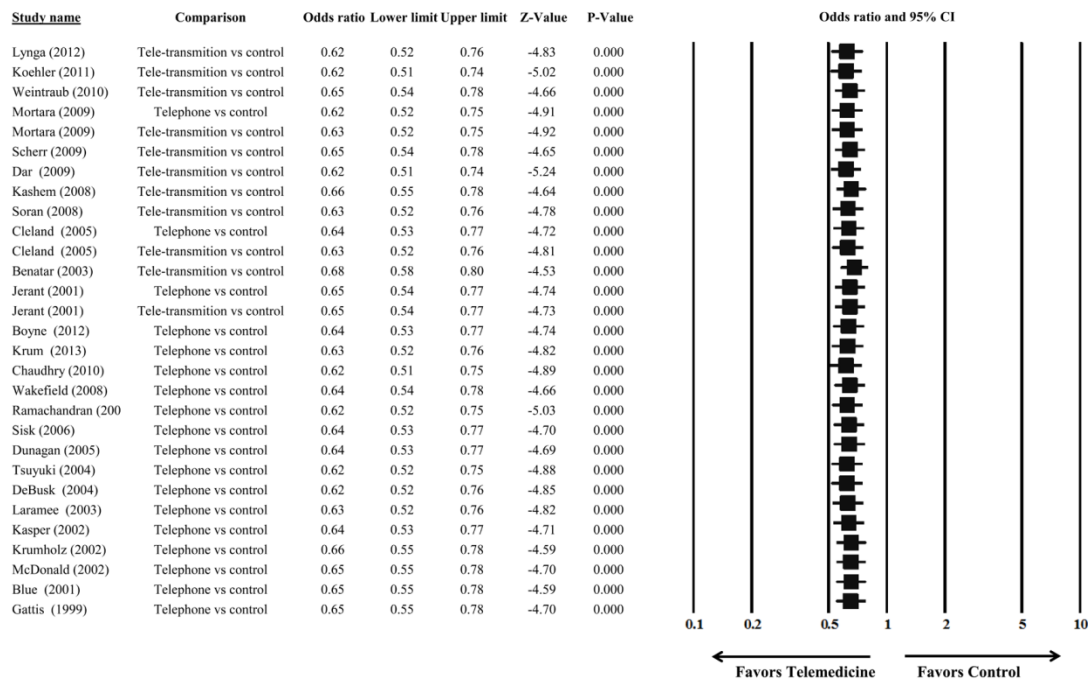

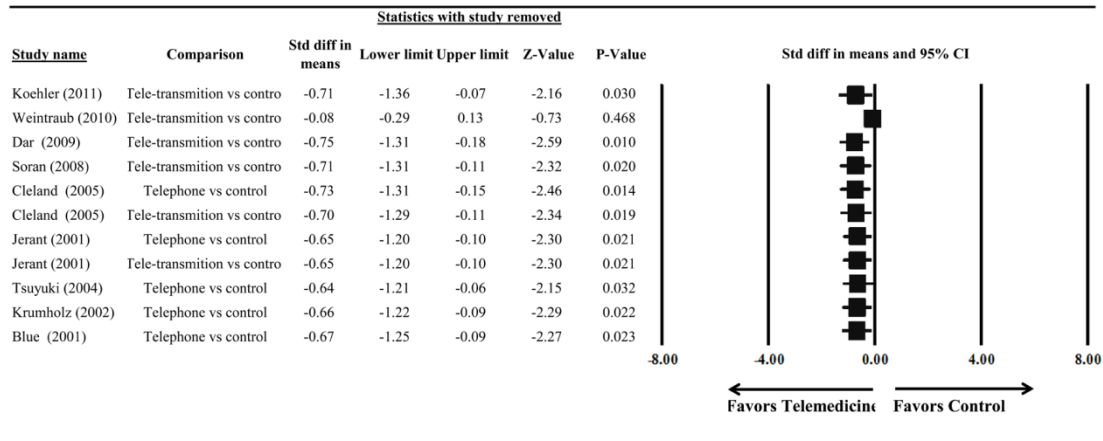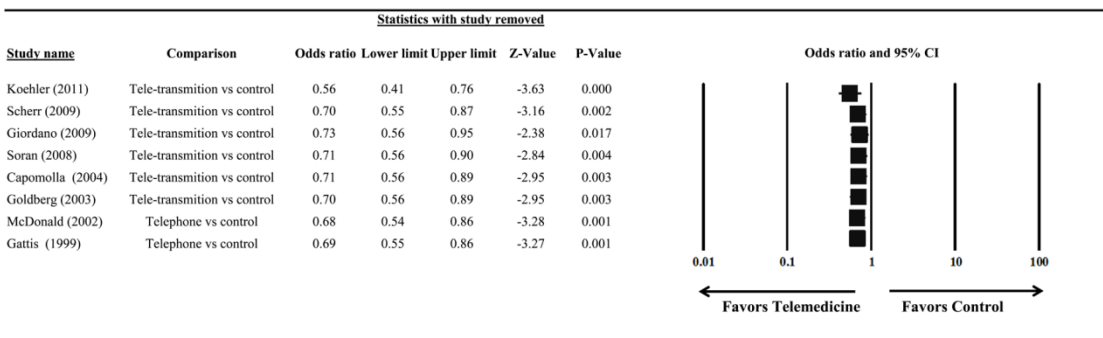

**Figure S2.** Funnel plots to detect bias: (A) all-cause hospital admission, (B) all-cause length of hospital stay, (C) all-cause mortality, (D) heart failure-related admission, (E) heart failure-related length of hospital stay, and (F) heart failure-related mortality.

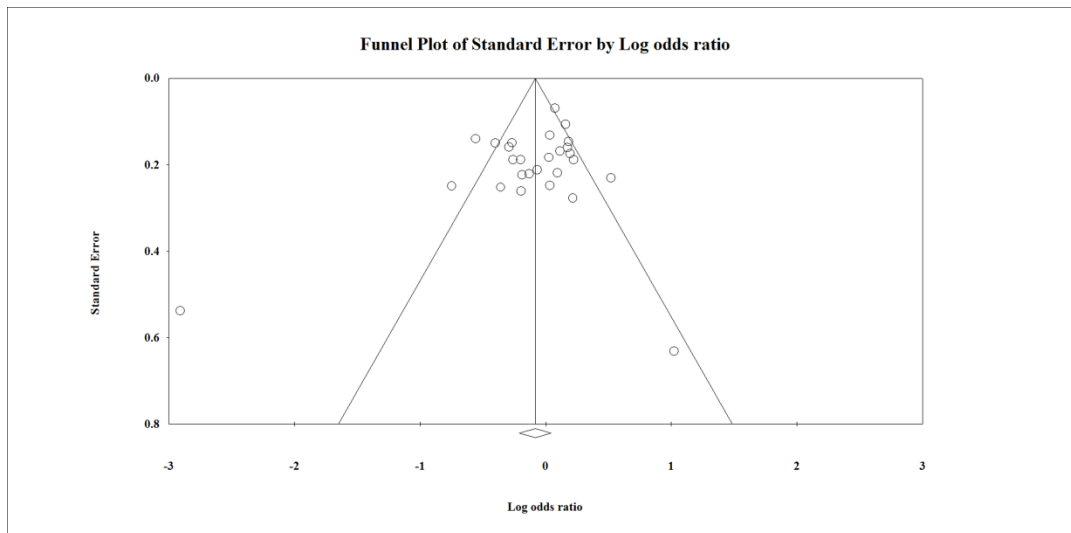

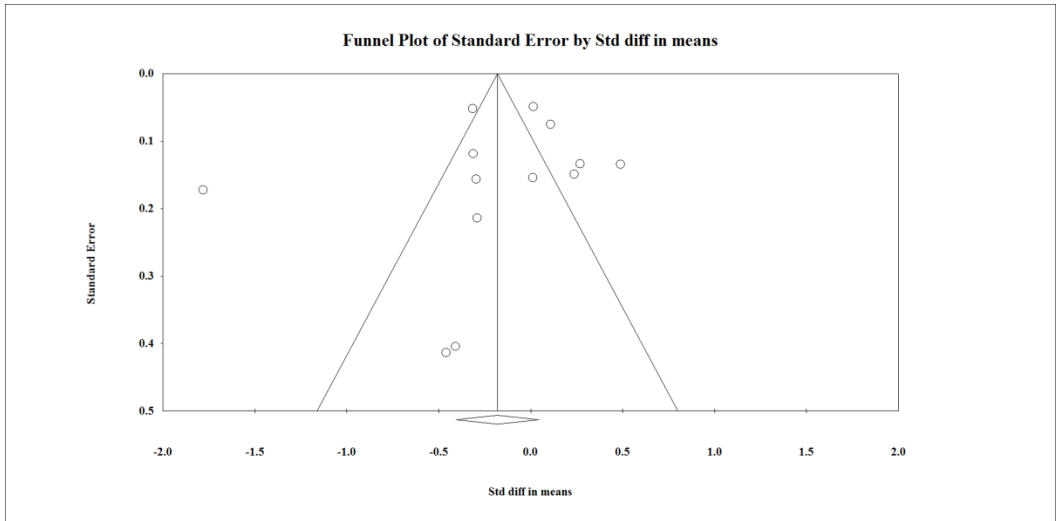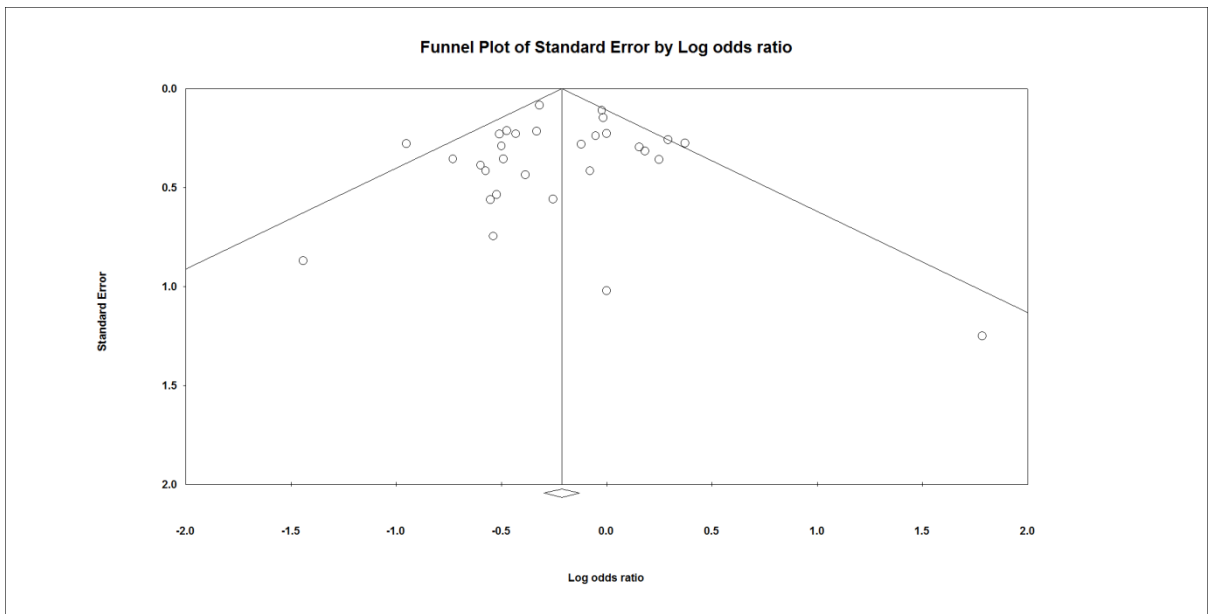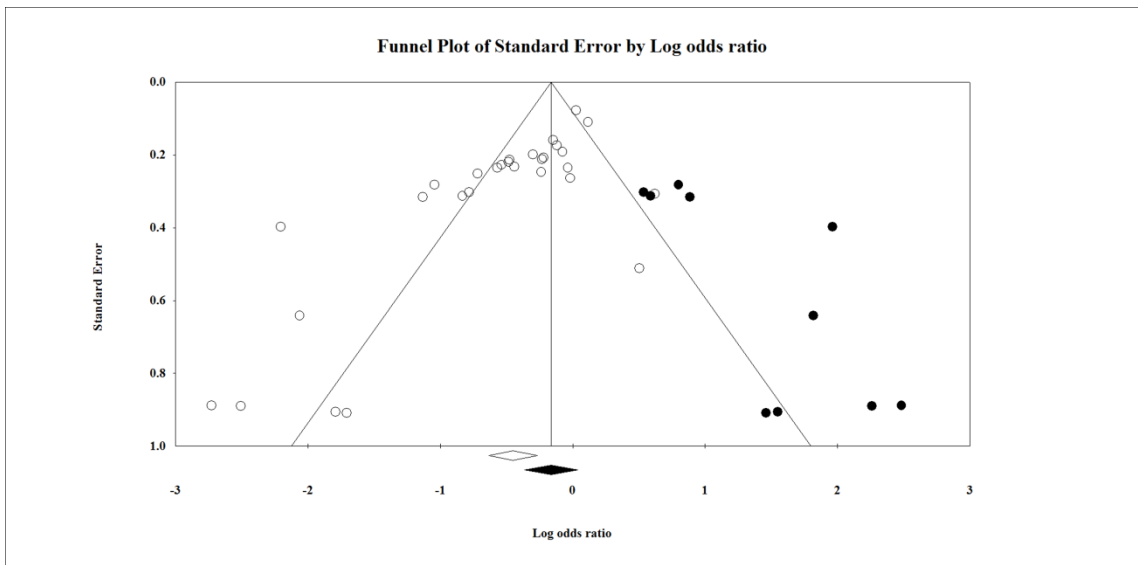

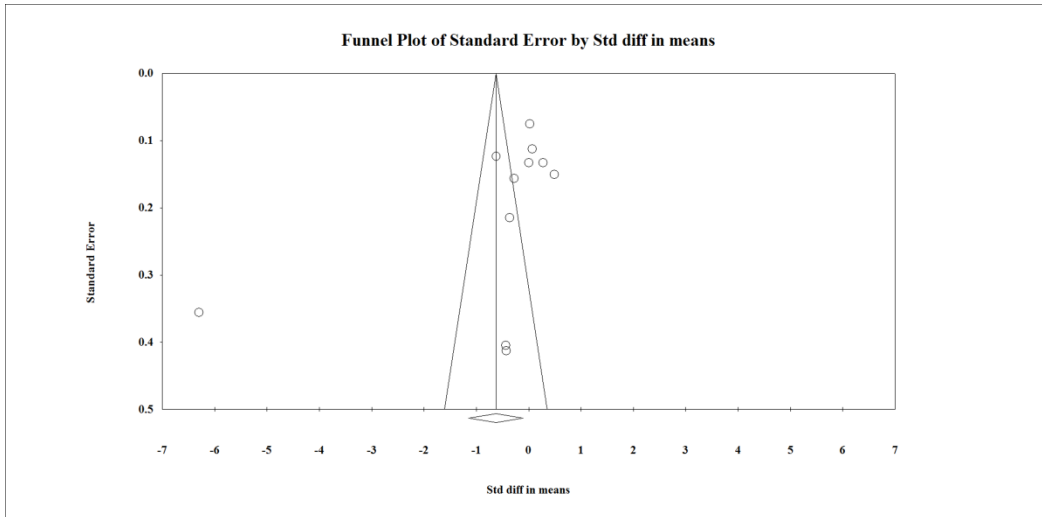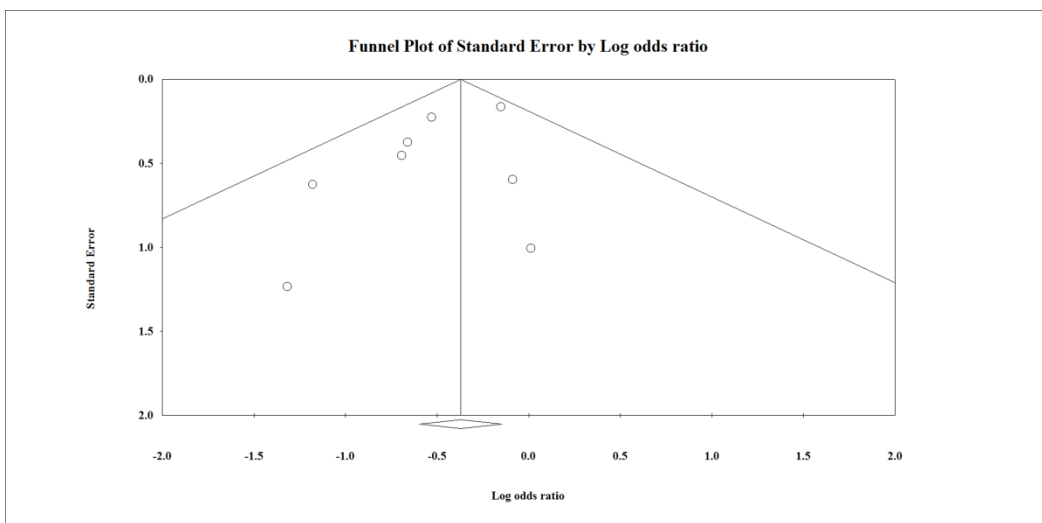

Supplement: inline-supplementary-material-2 [file inline-supplementary-material-2.pdf]
